# Supplementary material for: Association between monocyte chemoattractant protein-1 and blood pressure in smokers
Source: PubMed Central journal article supplement — J Int Med Res. 2017 Nov 3;46(3):965–74. doi: 10.1177/0300060517723415 (PMC5972233; doi:10.1177/0300060517723415), 2017-11-03
Supplement: supplementary_material.pdf [file supplementary_material.pdf]

**Supplemental Table 1. Clinical characteristics of nonsmokers**

|                          | Nonsmokers (n = 80) |   |    |
|--------------------------|---------------------|---|----|
| Age (years)              | 65                  | ± | 10 |
| Male/Female              | 19                  | / | 61 |
| BMI (kg/m <sup>2</sup> ) | 23.0 [19.8, 26.5]   |   |    |
| SBP (mmHg)               | 123                 | ± | 18 |
| DBP (mmHg)               | 70                  | ± | 11 |
| HbA1c (%)                | 5.8 [5.6, 6.1]      |   |    |
| HDL-C (mg/dL)            | 66                  | ± | 13 |
| LDL-C (mg/dL)            | 127                 | ± | 39 |
| MCP-1 (pg/mL)            | 310 [264, 380]      |   |    |

Data are presented as mean ± SD or median [interquartile range].

BMI, body mass index; SBP, systolic blood pressures; DBP, diastolic blood pressures; HbA1c, hemoglobin A1c; HDL-C, high-density lipoprotein cholesterol; LDL-C, low-density lipoprotein cholesterol; MCP-1, Monocyte chemoattractant protein-1.

**Supplemental Table 2. Gender-adjusted analysis on correlation between serum MCP-1 levels and clinical parameters in nonsmokers**

|                          | Univariate    |         | Multivariate  |         |
|--------------------------|---------------|---------|---------------|---------|
|                          | $\beta$ value | p value | $\beta$ value | p value |
| Age (years)              | 0.303         | 0.006   | 0.418         | 0.001   |
| BMI (kg/m <sup>2</sup> ) | 0.106         | 0.367   | 0.285         | 0.029   |
| SBP (mmHg)               | 0.184         | 0.105   | -             | -       |
| DBP (mmHg)               | 0.087         | 0.463   | -             | -       |
| HbA1c (%)                | -0.066        | 0.590   | -             | -       |
| HDL-C (mg/dL)            | 0.002         | 0.983   | -             | -       |
| LDL-C (mg/dL)            | -0.038        | 0.754   | -             | -       |

$\beta$  value: Correlation coefficients,  $R^2 = 0.162$

BMI, body mass index; SBP, systolic blood pressures; DBP, diastolic blood pressures; HbA1c, hemoglobin A1c; HDL-C, high-density lipoprotein cholesterol; LDL-C, low-density lipoprotein cholesterol.
